# Supplementary material
Source: Springer Nature journal article supplement (https://www.springermedizin.de/resource/supplementary/12888_2011_950_MOESM1_ESM.pdf/9479028)
Supplement: MOESM1 [file 9479028]

Assessed for eligibility  
(N=79)

Excluded (n=23)  
Did not meet inclusion criteria n=18  
Refused to participate (n=5)

Randomised (N=56)

Control group (n=29)  
Received standard care  
and treatment for 8 weeks

Assessment time  
Week 0: n=29  
Week 8: n=28  
Week 12: n=28

n=28 in analysis  
(n=1 excluded)

Intervention group (n=27)  
Received standard care  
and treatment, plus  
bibliotherapy programme  
for 8 weeks

Assessment time  
Week 0: n=27  
Week 8: n=26  
Week 12: n=26

n=26 in analysis  
(n=1 excluded)
